# Supplementary material
Source: Springer Nature journal article supplement (https://www.springermedizin.de/resource/supplementary/13002_2009_158_MOESM1_ESM.pdf/9627280)
Supplement: MOESM1 [file 9627280]

## Additional file

### Additional file 1: List of plant species collected from natural vegetation in the study area, Wonago Woreda (Habit: T-tree, Sh-shrub, H-herb, Cl-climber, and Ep - epiphytes, (M) – Medicinal Plant)

| Families       | Scientific name                                             | Local name   | Habit | Voucher No. |
|----------------|-------------------------------------------------------------|--------------|-------|-------------|
| Acanthaceae    | <i>Acanthus polystachius</i> Delile                         | Dedexxo      | Sh    | FM97        |
| Acanthaceae    | <i>Acanthus eminens</i> C.B.Clarke                          | Comexxo      | Sh    | FM201       |
| Acanthaceae    | <i>Justicia schimperiana</i> (Hochst. ex A. Nees) T. Anders | Dummiuggae   | Sh(M) | FM30        |
| Amaranthaceae  | <i>Cyathula uncinulata</i> (Schrad.) Schinz.                | Gixxaa       | H     | FM4         |
| Amaranthaceae  | <i>Cyathula cylindrica</i> Maq.                             | Gixxaa       | H     | FM80        |
| Amaranthaceae  | <i>Achyranthes aspera</i> L.                                | Derrgu       | H(M)  | FM115       |
| Amaranthaceae  | <i>Amaranthus spinosus</i> L.                               | Alemae       | H(M)  | FM180       |
| Anacardiaceae  | <i>Rhus vulgaris</i> Meikle                                 | Xxugutae     | Sh(M) | FM57        |
| Anacardiaceae  | <i>Schinus molle</i> L.                                     |              | T     | FM69        |
| Apiaceae       | <i>Oenanthe palustris</i> (Chiov.) Norman                   |              | H     | FM91        |
| Apiaceae       | <i>Centella asiatica</i> (L.) Urban.                        | Xxerexxo     | H     | FM125       |
| Apiaceae       | <i>Foeniculum vulgare</i> Mill.                             | Mello        | H(M)  | FM193       |
| Apocynaceae    | <i>Maytenus arbutifolia</i> (A. Rich) Wilczek               | Kombollechae | Sh(M) | FM138       |
| Araceae        | <i>Arisaema ennephyllum</i> Hochst. ex A. Rich              | Badenxxo     | T     | FM99        |
| Araliaceae     | <i>Polyscias fulva</i> (Hiern) Harms                        | Teleha       | T     | FM179       |
| Arecaceae      | <i>Phoenix reclinata</i> Jacq.                              | Xenebo       | T     | FM106       |
| Asclepiadaceae | <i>Gomphocarpus purpurascens</i> A. Rich                    | Mexxino      | Sh(M) | FM142       |

|                |                                                      |             |       |       |
|----------------|------------------------------------------------------|-------------|-------|-------|
| Asclepiadaceae | <i>Kanahla laniflora</i> (Forssk.) R. Br.            | Wundiffo    | Sh(M) | FM136 |
| Asparagaceae   | <i>Asparagus africanus</i> Lam.                      | Uffae       | Sh(M) | FM206 |
| Asteraceae     | <i>Gnaphalium rubriflorum</i> Hilliard               | Nophixxo    | H     | FM12  |
| Asteraceae     | <i>Cirsium englerianum</i> O. Hoffm.                 | Galigloo    | H     | FM64  |
| Asteraceae     | <i>Sphaeranthus suaveolens</i> (Forssk.) DC          |             | H     | FM77  |
| Asteraceae     | <i>Xanthium spinosum</i> L.                          |             | H     | FM88  |
| Asteraceae     | <i>Tagetes minuta</i> L.                             | Chebbo      | H     | FM148 |
| Asteraceae     | <i>Dicrocephala integrifolia</i> (L.F.) O.<br>Kuntze | Gishtu      | H     | FM151 |
| Asteraceae     | <i>Echinops amplexicaulis</i> Oliv.                  | Messichae   | H     | FM173 |
| Asteraceae     | <i>Crepis rueppellii</i> Sch. Bip.                   |             | H     | FM178 |
| Asteraceae     | <i>Guizotia scabra</i> (Vis.) Chiov.                 |             | H     | FM207 |
| Asteraceae     | <i>Parthenium hysterophorus</i> L.                   | Partinumae  | H(M)  | FM2   |
| Asteraceae     | <i>Xanthium strumarium</i> L.                        | Dehanekayae | H(M)  | FM9   |
| Asteraceae     | <i>Carduus leptacanthus</i> Fresen.                  | Guccino     | H(M)  | FM86  |
| Asteraceae     | <i>Cirsium englerianum</i> O. Hoffm.                 | Galigloo    | H(M)  | FM143 |
| Asteraceae     | <i>Guizotia abyssinica</i> (L.F.) Cass.              | Mechae      | H(M)  | FM154 |
| Asteraceae     | <i>Laggera alata</i> (D.Don) Sch. Big. ex<br>Oliv.   | Luggae      | Sh    | FM112 |
| Asteraceae     | <i>Laggera crispata</i> (Vahl) Hepper                | Hoppicho    | Sh    | FM116 |
| Asteraceae     | <i>Vernonia amygdalina</i> Del.                      | Ebicha      | Sh(M) | FM31  |
| Asteraceae     | <i>Vernonia auriculifera</i> Hiern.                  | Dangireto   | Sh(M) | FM144 |
| Bignoniaceae   | <i>Jacaranda mimosifolia</i> D. Don.                 | Y/zafae     | T     | FM145 |

|                 |                                                     |              |       |       |
|-----------------|-----------------------------------------------------|--------------|-------|-------|
| Boraginaceae    | <i>Cynoglossum coervleum</i> Hochst ex A. Rich      | Korchibae    | H     | FM135 |
| Boraginaceae    | <i>Cynoglossum lanceolatum</i> Forsk.               | Korchibae    | H(M)  | FM114 |
| Boraginaceae    | <i>Cordia africana</i> Lam.                         | Waddissa     | T     | FM167 |
| Burseraceae     | <i>Boswellia neglecta</i> S. Moore                  | Galgalchae   | T     | FM175 |
| Caryophyllaceae | <i>Drymaria cordata</i> (L.) Schltes                |              | H     | FM166 |
| Caryophyllaceae | <i>Stellaria sennii</i> Chiov.                      |              | H(M)  | FM188 |
| Casuarinaceae   | <i>Casuarina cunninghamiana</i> Miq.                | Shewshewae   | T(M)  | FM76  |
| Celastraceae    | <i>Catha edulis</i> (Vahl.) Forssk ex Endl.         | Chatae       | Sh(M) | FM19  |
| Celastraceae    | <i>Maytenus senegalensis</i> (L.) Excell            | Shekko       | Sh(M) | FM54  |
| Celastraceae    | <i>Maytenus arbutifolia</i> (A. Rich) Wilczek       | Kombollechae | Sh    | FM138 |
| Clusiaceae      | <i>Hypericum peplidifolium</i> A.Rich               | Dammae       | Sh    | FM195 |
| Clusiaceae      | <i>Hypericum revolutum</i> Vahl.                    |              | Sh(M) | FM93  |
| Commelinaceae   | <i>Commelina diffusa</i> Burm. F.                   | W/hankurae   | H     | FM129 |
| Cucurbitaceae   | <i>Dactyliandra stenfaninii</i> (Chiov.) C. Jeffrey |              | Cl    | FM192 |
| Cucurbitaceae   | <i>Lagenaria siceraria</i> (Molina) Standl.         | Botto        | H(M)  | FM205 |
| Cucurbitaceae   | <i>Momordica foetida</i> Schumach &Thonn.           | Yubarrae     | Sh(M) | FM108 |
| Cupressaceae    | <i>Juniperus procera</i> Hochst ex Engl.            | Xxdiae       | T     | FM159 |
| Cyperaceae      | <i>Cyperus mundfii</i> (Nees) Kunth                 | Rogrogal     | H     | FM82  |
| Cyperaceae      | <i>Cyperus dichroostachyus</i> A. Rich              | Embuteteya   | H     | FM147 |
| Dracaenaceae    | <i>Dracaena afromontana</i> Mild Br.                | Woreko       | T     | FM174 |
| Dracaenaceae    | <i>Dracaena steudneri</i> Engl.                     | Afrafartu    | T(M)  | FM37  |

|               |                                                        |             |       |       |
|---------------|--------------------------------------------------------|-------------|-------|-------|
| Euphorbiaceae | <i>Manihot esculenta</i> Granz                         | Yammenoi    | H     | FM119 |
| Euphorbiaceae | <i>Tragia cinerea</i> (Pax) Gilbert & Radcl.<br>Smith. | Aleblabitae | H(M)  | FM87  |
| Euphorbiaceae | <i>Euphorbia pulcherrina</i> (R. Grah.) Willd          | Abababo     | Sh    | FM41  |
| Euphorbiaceae | <i>Euphorbia tirucalli</i> L.                          | Kinchbae    | Sh(M) | FM40  |
| Euphorbiaceae | <i>Euphorbia candelabrum</i> Kostshy                   | Addama      | Sh(M) | FM48  |
| Euphorbiaceae | <i>Ricinus communis</i> L.                             | Gulloo      | Sh(M) | FM71  |
| Euphorbiaceae | <i>Macaranga capensis</i> (Baill.) Sim                 | Yunddae     | T     | FM32  |
| Euphorbiaceae | <i>Sapium ellipticum</i> (Krauss) Pax                  | Waggiso     | T     | FM211 |
| Euphorbiaceae | <i>Croton macrostachyus</i> Del.                       | Bissano     | T(M)  | FM162 |
| Fabaceae      | <i>Caesalpinia decapetala</i> (Roth) Alston            | Konnxxera   | Cl    | FM186 |
| Fabaceae      | <i>Crotalaria pallida</i> Ait.                         |             | H     | FM95  |
| Fabaceae      | <i>Senna occidentalis</i> (L.) Link                    | Assenmeka   | H(M)  | FM103 |
| Fabaceae      | <i>Indigofera emarginella</i> A. Rich                  | Boffae      | H(M)  | FM172 |
| Fabaceae      | <i>Sesbania sesban</i> (L.) Merr.                      |             | Sh    | FM113 |
| Fabaceae      | <i>Leucaena leucocephala</i> L.                        |             | Sh    | FM169 |
| Fabaceae      | <i>Calpurnia aurea</i> (Alt.) Benth.                   | Chekketa    | Sh(M) | FM98  |
| Fabaceae      | <i>Acacia abyssinica</i> Hochst. ex Benth.             | wochhoo     | T     | FM100 |
| Fabaceae      | <i>Delonix regia</i> (Boj. ex Hook.) Ref.              | Yed/zafae   | T     | FM130 |
| Fabaceae      | <i>Erythrina brucei</i> Schweinf.                      | Korchae     | T(M)  | FM79  |
| Fabaceae      | <i>Millettia ferruginea</i> (Hochst.) Bak.             | Berberae    | T(M)  | FM190 |
| Fabaceae      | <i>Pisium sativum</i> L.                               | Attaro      | H     | FM128 |
| Lamiaceae     | <i>Saliva nilotica</i> Juss. ex Jacq.                  |             | H     | FM85  |

|                 |                                                           |                |       |       |
|-----------------|-----------------------------------------------------------|----------------|-------|-------|
| Lamiaceae       | <i>Satureja paradoxa</i> (Vatke) Engler                   | Naddae         | H     | FM204 |
| Lamiaceae       | <i>Otostegia tomentosa</i> A. Rich.                       | Mukalonii      | Sh    | FM63  |
| Lamiaceae       | <i>Pyconostachys eminii</i> Gurke                         | Shegino        | Sh    | FM102 |
| Lauraceae       | <i>Persea americana</i> Mill.                             | Kokae          | T     | FM75  |
| Loganiaceae     | <i>Buddleja polystachya</i> Fresen.                       | Affarao        | Sh(M) | FM7   |
| Loranthaceae    | <i>Englerina woodfordioides</i> (Schweinf.)<br>M.Gilbert  | Eritobekkesisa | EP    | FM141 |
| Malvaceae       | <i>Hibiscus flavifolius</i> Ulbar.                        | Bayirro        | H     | FM109 |
| Malvaceae       | <i>Malva verticillata</i> L.                              | Xxummo         | H     | FM160 |
| Malvaceae       | <i>Sida schimperiana</i> Hochst. ex A. Rich.              | Gebresede      | Sh(M) | FM170 |
| Melastomataceae | <i>Dissotis senegambiensis</i> (Guill. & Pern)<br>Triana  | Arkaae         | H     | FM156 |
| Meliaceae       | <i>Melia azedarach</i> L.                                 | Nemae          | T     | FM118 |
| Meliaceae       | <i>Ekebergia capensis</i> Sparm.                          | Sessa          | T     | FM185 |
| Meliaceae       | <i>Trichilia dregeana</i> Sond.                           | Yumbarro       | T(M)  | FM126 |
| Meliantaceae    | <i>Bersama abyssinica</i> Fresen.                         | Jejjeba        | Sh(M) | FM163 |
| Menispermaceae  | <i>Stephania abyssinica</i> (Dilloy and A.<br>Rich) Walp. | Shesheno       | H     | FM101 |
| Moraceae        | <i>Ficus sur</i> Forssk.                                  | Sholae         | T     | FM161 |
| Moraceae        | <i>Ficus ovata</i> Vahl                                   | Shollae        | T(M)  | FM153 |
| Moringaceae     | <i>Moringa stenopetala</i> L.                             | Shefferaw      | T(M)  | FM62  |
| Myrsinaceae     | <i>Embelia schimperi</i> Vatke.                           | Sharrenge      | Sh(M) | FM122 |
| Myrsinaceae     | <i>Maesa lanceolata</i> Forssk.                           | Kaggano        | T(M)  | FM210 |

|                |                                                 |            |       |       |
|----------------|-------------------------------------------------|------------|-------|-------|
| Myrtaceae      | <i>Psidium guajava</i> L.                       | Gettamae   | Sh    | FM89  |
| Myrtaceae      | <i>Callistemon citrinus</i> (Curtis) Skeels     | Paricho    | Sh    | FM155 |
| Myrtaceae      | <i>Syzygium guineense</i> (Willd.) DC.          | Debobessa  | T     | FM117 |
| Myrtaceae      | <i>Eucalyptus saligna</i> Smith                 | K/barzafae | T     | FM157 |
| Myrtaceae      | <i>Eucalyptus globulus</i> Labill               | D/barzafae | T(M)  | FM150 |
| Oleaceae       | <i>Jasminum abyssinicum</i> Hochst. ex A. Rich. | Tembele    | Cl    | FM177 |
| Oleaceae       | <i>Olea europaea</i> L.                         | Wayro      | T(M)  | FM187 |
| Oxalidaceae    | <i>Oxalis radicata</i> A. Rich.                 |            | H     | FM127 |
| Papaveraceae   | <i>Argemone mexicana</i> L.                     | Kossalae   | H(M)  | FM81  |
| Passifloraceae | <i>Passiflora edulis</i> Sims                   | Woyane     | Cl    | FM134 |
| Phytolaccaceae | <i>Phytolacca dodecandra</i> L'Herit.           | Indodae    | Sh(M) | FM176 |
| Pinaceae       | <i>Pinus radiata</i> L.                         |            | T     | FM92  |
| Plantaginaceae | <i>Plantago lanceolata</i> L.                   | Diggixxae  | H     | FM107 |
| Poaceae        | <i>Cynodon dactylon</i> (L.) Pers.              | Serdoo     | H     | FM110 |
| Poaceae        | <i>Hyparrhenia filipendula</i> (Hochst.) Stat   | Gedecho    | H     | FM137 |
| Poaceae        | <i>Panicum maximum</i> Jacq.                    |            | H     | FM140 |
| Poaceae        | <i>Arundinaria alpine</i> K.Schum.              | Kerrkeha   | H     | FM152 |
| Poaceae        | <i>Snowdenia polystachya</i> (Fresen.) Pilg.    |            | H     | FM183 |
| Poaceae        | <i>Arundo donax</i> L.                          | Serrdo     | H     | FM214 |
| Podocarpaceae  | <i>Podocarpus falcatus</i> (Thunb.) Mirb.       | Zigebo     | T(M)  | FM11  |
| Polygonaceae   | <i>Rumex nepalensis</i> Spreng.                 | Dangago    | H(M)  | FM10  |
| Protaceae      | <i>Grevillea robusta</i> R. Br.                 |            | T     | FM182 |

|               |                                                    |              |       |       |
|---------------|----------------------------------------------------|--------------|-------|-------|
| Resedaceae    | <i>Caylusea abyssinica</i> (Fresen.) Fisch. & Mey. | Sheggitae    | H(M)  | FM131 |
| Rhamnaceae    | <i>Rhamnus prinoides</i> L'Herit.                  | Gesho        | Sh    | FM49  |
| Rosaceae      | <i>Alchemilla cryptantha</i> A. Rich               | Imbricho     | H     | FM124 |
| Rosaceae      | <i>Rubus steudneri</i> Shweinf.                    | Engorae      | Sh    | FM74  |
| Rosaceae      | <i>Rubus apetalus</i> Poir.                        | Engorae      | Sh    | FM149 |
| Rosaceae      | <i>Malus sylvestris</i> Miller                     | Apiliae      | T     | FM53  |
| Rosaceae      | <i>Hagenia abyssinica</i> (Brucie.) J. F. Gmel     | Kossae       | T(M)  | FM120 |
| Rosaceae      | <i>Prunus africana</i> (Hook. F.) Kalkam           | T/kaka       | T(M)  | FM209 |
| Rubiaceae     | <i>Coffea arabica</i> L.                           | Bunno        | Sh(M) | FM1   |
| Rubiaceae     | <i>Pentas schimperiana</i> (A. Rich) Vatke         | Dibexxo      | Sh(M) | FM78  |
| Rutaceae      | <i>Vepris dainellii</i> (Pichi-Serm.) Kokwaro      |              | Sh    | FM133 |
| Rutaceae      | <i>Citrus medica</i> L.                            | Burtukanae   | Sh    | FM189 |
| Rutaceae      | <i>Citrus limon</i> (L.) Burm.F.                   | Lomae        | Sh(M) | FM123 |
| Santalaceae   | <i>Osyris quadripartita</i> Decn.                  | Watto        | Sh(M) | FM105 |
| Sapindaceae   | <i>Dodonaea angustifolia</i> L.                    | Ittechhae    | Sh    | FM83  |
| Sapindaceae   | <i>Allophylus abyssinicus</i> (Hochst.) Radlk.     | Embesae      | T     | FM132 |
| Sapotaceae    | <i>Pouteria adolfi-friederici</i> (Engl.) Baenni   | Quarero      | T     | FM200 |
| Simaroubaceae | <i>Brucea antidysenterica</i> J.F. Mill.           | Kapparro     | Sh(M) | FM202 |
| Solanaceae    | <i>Datura stramonium</i> L.                        | Ashefareceae | H(M)  | FM47  |
| Solanaceae    | <i>Solanum americanum</i> Miller                   | Dinicha      | Sh    | FM73  |
| Solanaceae    | <i>Solanum anguiniri</i> Lam.                      | Embayo       | Sh    | FM203 |
| Solanaceae    | <i>Nicotiana tabacum</i> L.                        | Tambo        | Sh(M) | FM56  |

|                  |                                               |                   |       |       |
|------------------|-----------------------------------------------|-------------------|-------|-------|
| Solanaceae       | <i>Solanum indicum</i> L.                     | Dimoxxa<br>embayo | Sh(M) | FM104 |
| Solanaceae       | <i>Discopodium penninervum</i> Hochst.        | Serbae            | T(M)  | FM198 |
| Thelypteridaceae | <i>Thelypteris confluens</i> (Thunb.) Morton. |                   | H     | FM8   |
| Tiliaceae        | <i>Grewia ferruginea</i> Hochst.ex A. Rich.   | Ogomdii           | Sh(M) | FM121 |
| Tiliaceae        | <i>Triumfetta tomentosa</i> Boj.              | Kombocho          | Sh(M) | FM171 |
| Urticaceae       | <i>Droguetia iners</i> (Forssk.) Schweinf.    | Haroxxae          | H     | FM191 |
| Urticaceae       | <i>Girardinia diversifolia</i> (Link.)Friis   | Mutate            | H     | FM199 |
| Verbenaceae      | <i>Lippia adoensis</i> Hochst ex Walp.        | Kessae            | Sh    | FM197 |
| Verbenaceae      | <i>Lantana camara</i> L.                      | Yewoffekolo       | Sh(M) | FM146 |
| Vitaceae         | <i>Cissus qudriangularis</i> L.               | Chobihada         | Cl    | FM27  |

---
